# Supplementary material for: A Symmetrical Fuzzy Neural Network Regression Method Coordinating Structure and Parameter Identifications for Regression
Source: MDPI journal article supplement (doi:10.3390/sym15091711), 2023-09-06
Supplement: s1 [file s1]

# Supplementary Materials

## S1 Baseline datasets

28 real regression data sets with varying numbers of features (2 to 40) and sample sizes (337 to 40,768) are used as baseline datasets. According to the feature dimension, the datasets are divided into two categories: 11 low-dimensional data sets and 17 high-dimensional data sets. TABLE 1 and TABLE 2 show the detailed information of the above two datasets, respectively, including the names, abbreviations, feature numbers, and sample sizes.

TABLE S1. The low-dimensional data sets

| Data sets                | Abbreviation | No. of features | No. of samples |
|--------------------------|--------------|-----------------|----------------|
| Electrical Length        | ELE1         | 2               | 495            |
| Plastic Strength         | PLA          | 2               | 1650           |
| Quake                    | QUA          | 3               | 2178           |
| Electrical Maintenance   | ELE2         | 4               | 1056           |
| Friedman                 | FRIE         | 5               | 1200           |
| Auto MPG6                | MPG6         | 5               | 398            |
| Delta Ailerons           | DELA1L       | 5               | 7129           |
| Daily Electricity Energy | DEE          | 6               | 365            |
| Delta Elevators          | DELELV       | 6               | 9517           |
| Analcat                  | ANA          | 7               | 4052           |
| Auto MPG8                | MPG8         | 7               | 398            |

TABLE S2. The high-dimensional data sets

| Data sets                    | Abbreviation | No. of features | No. of samples |
|------------------------------|--------------|-----------------|----------------|
| Abalone                      | ABA          | 8               | 4177           |
| California Housing           | CAL          | 8               | 20640          |
| Concrete Concessive Strength | CON          | 8               | 1030           |
| Stock prices                 | STP          | 9               | 950            |
| Weather Ankara               | WAN          | 9               | 1609           |
| Weather Izmir                | WIZ          | 9               | 1461           |
| MV Artificial Domain         | MV           | 10              | 40768          |
| Forest Fires                 | FOR          | 12              | 517            |
| Mortgage                     | MOR          | 15              | 1049           |
| Treasury                     | TRE          | 5               | 1049           |
| Baseball                     | BAS          | 16              | 337            |
| House-16H                    | HOU          | 16              | 22784          |
| Elevators                    | ELV          | 18              | 16559          |
| Computer Activity            | CA           | 21              | 8192           |
| Pole Telecommunications      | POLE         | 26              | 14998          |
| Pumadyn                      | PUM          | 32              | 8192           |
| Ailerons                     | AIL          | 40              | 13750          |

## S2 FNNR-M

The FNNR using Mamdani fuzzy rules is illustrated in Figure 1.

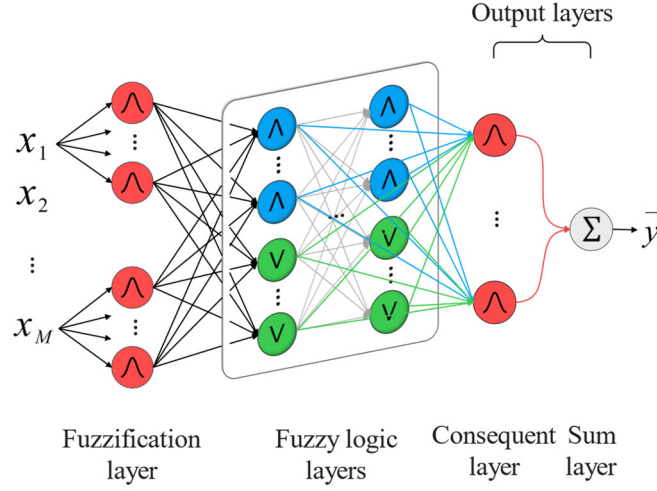

Figure S1. The structure of the FNNR-M

It can be observed that the output layers of FNNR-M consist of one consequent layer and one sum layer. The nodes of the consequent layer represent the fuzzy sets of the output variable, and the number of nodes represents the fuzzy partition number of the output variable, which is set to  $H_M$ . The parameters of the consequent layer are continuous real values in the interval  $[0,1]$ , representing the weight of each rule. The consequent layer is fully connected with the fuzzy logic layers, and the output of each consequent layer node is the weighted sum of firing strengths of the rules whose consequent is the corresponding fuzzy set. The output of the sum layer is shown in Equation (1):

$$\bar{y} = \frac{\sum_i \hat{c}_i u_i}{\sum_i u_i} \quad (1)$$

where  $\hat{c}_i$  is the parameter of the edge connecting the node of the sum layer and the  $i^{th}$  node of the consequent layer, which represents the center of the consequent fuzzy set, that is, the mean value of the Gaussian membership functions (MFs).  $u_i$  is the output of the  $i^{th}$  consequent layer. Mamdani fuzzy rules can be directly extracted from the trained FNNR-M. For the FNNR-M, the parameter scale of the output layers is  $H_M \cdot K$ , where  $K$  is the number of nodes in fuzzy logic layers.

## S3 FNNR-F

Replace the output layers of the FNNR with fully connected layers, and the model after the replacement is called the FNNR-F.

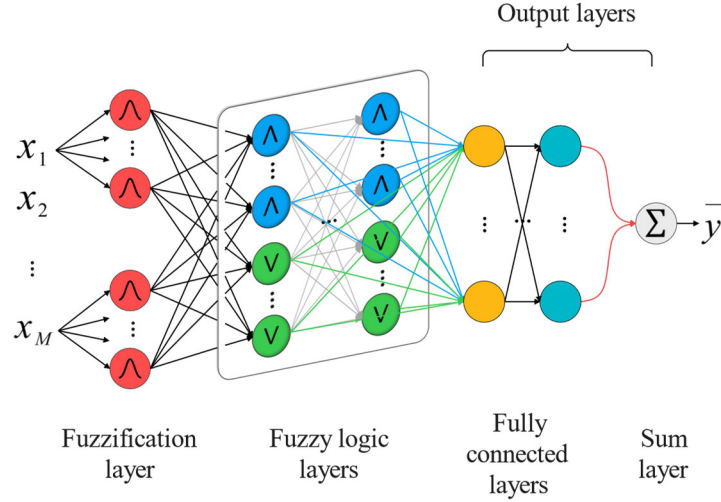

Figure S2. The structure of the FNNR-F

In the FNNR-F, the output layers are composed of the fully connected layers and one sum layer, where the fully connected layers are fully connected with fuzzy logic layers. The layer number of fully connected layers is set as  $I_F (I_F \geq 1)$ , and the number of nodes of each layer is set as  $n_F$ . The ReLU function is utilized as the activation function. The parameter scale of the output layers is  $I_F \cdot (n_F + 1) + n_F \cdot K$ .

#### S4 Time complexity analysis of the three models

Figure 3 reveals the normalized training time of the three models. In the figure, before and after the dotted line are the training time of each model on low-dimensional and high-dimensional data sets, respectively. It can be observed that on most low-dimensional data sets, there are little differences in the time consumptions of the three models, but generally, the training time of FNNR-F is relatively longer (the FNNR-F spends the longest time on 6 of 11 data sets). This is because for the FNNR-F, the number of parameters is large and the complexity is high. The training time of the FNNR-T is advantageous on data sets with relatively large sample sizes like DELAIL, DELELV, and ANA.

On high-dimensional data sets, the FNNR-T has an advantage in time consumption on data sets with relatively large sample sizes like CAL and MV, while the consumed time of the FNNR-M is long. As the number of features increases, the time consuming of the FNNR-T also increases, which is the result of the positive correlation between the model complexity of the FNNR-T and its feature dimension. The running time of FNNR-M is overall middle-ranking. The FNNR-F takes the longest time on most data sets, and the time on datasets with large features and large sample sizes is slightly shorter than that of the FNNR-T.

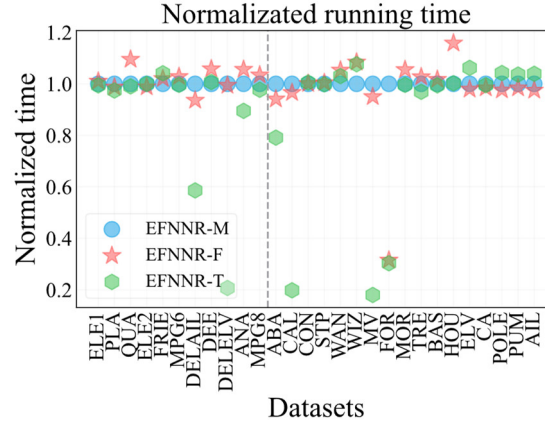

Figure S3. The normalized training time of the FNNR-M, FNNR-F, and FNNR-T on 28 data sets

### S5 The experimental results of the three models on the ablation study of the alternate training strategy

TABLE III shows the average MSEs of the three models on 28 data sets using the alternate training strategy and the normal training method. To highlight the role of alternate training strategy, parameters of MFs and fuzzy partitions are fixed during the training, and the whole training is only divided into two stages: the stage of joint training and the stage of the fixed fuzzy logic layer. As can be observed from TABLE III, regardless of the model, on most data sets, the regression errors obtained by utilizing the alternate training strategy are lower (2% to 80%) than that obtained by using the normal training method.

TABLE S3. The average prediction errors of the three models with alternate training strategy and normal training method on 28 data sets

| Data sets | FNNR-M    |              | FNNR-F    |        | FNNR-T    |              |
|-----------|-----------|--------------|-----------|--------|-----------|--------------|
|           | Alternate | Normal       | Alternate | Normal | Alternate | Normal       |
| ELE1      | 1.622     | 1.774        | 1.361     | 1.642  | 1.504     | 1.526        |
| PLA       | 1.080     | 1.116        | 1.062     | 1.157  | 1.095     | 1.129        |
| QUA       | 0.018     | 0.0190       | 0.0184    | 0.0189 | 0.0192    | 0.0193       |
| ELE2      | 5882      | 8147         | 2585      | 12831  | 3922      | 7586         |
| FRIE      | 0.608     | 0.699        | 0.682     | 0.784  | 0.605     | 0.630        |
| MPG6      | 3.618     | 3.755        | 3.623     | 3.769  | 3.696     | 3.759        |
| DELA      | 1.513     | <u>1.498</u> | 1.396     | 1.625  | 1.456     | 1.897        |
| DEE       | 0.077     | 0.081        | 0.0767    | 0.0876 | 0.080     | 0.083        |
| DELELV    | 1.017     | 1.021        | 0.928     | 1.012  | 1.015     | 1.042        |
| ANA       | 0.003     | 0.004        | 0.003     | 0.005  | 0.004     | <u>0.004</u> |
| MPG8      | 3.402     | 3.593        | 2.700     | 3.180  | 3.095     | 3.215        |
| ABA       | 2.080     | 2.087        | 1.973     | 2.162  | 2.050     | <u>2.050</u> |
| CAL       | 1.714     | 2.088        | 1.582     | 2.060  | 1.674     | 2.061        |
| CON       | 17.08     | 27.54        | 16.375    | 42.13  | 15.42     | 21.88        |
| STP       | 0.299     | 0.449        | 0.279     | 0.500  | 0.288     | 0.362        |
| WAN       | 0.729     | 0.857        | 0.834     | 2.216  | 0.741     | 1.533        |

|      |       |              |       |              |       |             |
|------|-------|--------------|-------|--------------|-------|-------------|
| WIZ  | 0.697 | 0.743        | 0.669 | 0.828        | 0.655 | 0.708       |
| MV   | 0.031 | 0.135        | 0.048 | 0.432        | 0.019 | 0.125       |
| FOR  | 4018  | <u>4018</u>  | 3998  | 4083         | 4010  | <u>4010</u> |
| MOR  | 0.009 | <u>0.009</u> | 0.004 | 0.018        | 0.003 | 0.006       |
| TRE  | 0.032 | 0.035        | 0.025 | 0.036        | 0.025 | 0.031       |
| BAS  | 1.796 | 1.866        | 1.721 | <u>1.591</u> | 1.896 | 1.886       |
| HOU  | 6.990 | 9.218        | 6.729 | 7.267        | 6.850 | 7.317       |
| ELV  | 2.519 | 2.602        | 1.987 | 2.815        | 2.500 | 5.963       |
| CA   | 3.769 | 3.838        | 3.432 | 4.739        | 2.766 | 4.125       |
| POLE | 36.16 | 58.62        | 8.788 | 82.42        | 25.11 | 46.11       |
| PUM  | 0.326 | 1.027        | 0.157 | 1.447        | 0.198 | 0.680       |
| AIL  | 1.342 | <u>1.338</u> | 1.309 | 1.364        | 1.303 | 1.399       |

Of course, in a few data sets, the regression MSEs of the model using the normal training method are not much different from that using the alternate training strategy, and on some data sets, the formers are even smaller, which are underlined in the table. This is because, under the alternate training strategy, different parameters are trained separately, and all kinds of parameters need more time to “run in” with each other to achieve the optimal solution. This means that although the alternate training strategy can help the model converge eventually, it also prolongs the time of convergence, while for the normal training method, the global optimal solution may be found in advance on occasion although it can cause the constant oscillation of parameters.
