# Supplementary material for: A Symmetrical Fuzzy Neural Network Regression Method Coordinating Structure and Parameter Identifications for Regression
Source: MDPI journal article supplement (doi:10.3390/sym15091711), 2023-09-06
Supplement: s1 [file s1]

Archive with 1 entries (1 files):
- symmetry-2553475-supplementary.pdf
